# Supplementary material for: Ethylene –dependent and –independent superficial scald resistance mechanisms in ‘Granny Smith’ apple fruit
Source: PubMed Central journal article supplement (PMC6065312; doi:10.1038/s41598-018-29706-x), 2018-07-30
Supplement: 41598_2018_29706_MOESM1_ESM.pdf [file 41598_2018_29706_MOESM1_ESM.pdf]

## **Ethylene -dependent and -independent superficial scald resistance mechanisms in 'Granny Smith' apple fruit**

Evangelos Karagiannis, Michail Michailidis, Georgia Tanou, Martina Samiotaki, Katerina Karamanoli, Evangelia Avramidou, Ioannis Ganopoulos, Panagiotis Madesis, Athanassios Molassiotis

### **Supplementary data**

Supplementary Figures 1-2 and Supplementary Tables 1-6

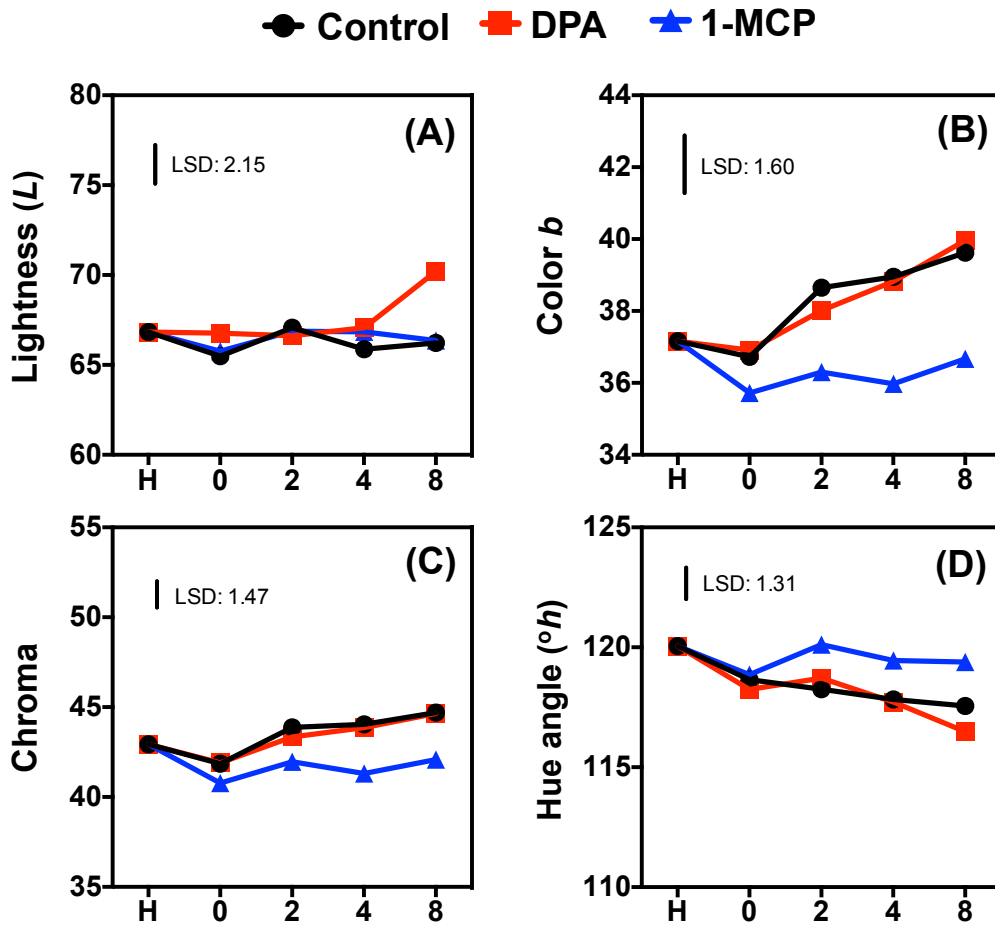

Supplementary Figure 1

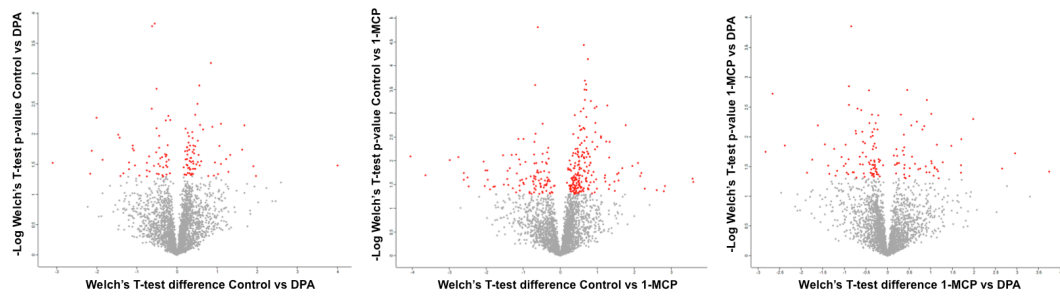

**Supplementary Figure 2**

## **Additional information**

**Supplementary Fig. S1.** *Color changes throughout apple ripening.*

**Supplementary Fig. S2.** *Volcano plots generated for each performed comparison, using the Welch's T-test results: Control versus DPA (A), Control versus 1-MCP (B), DPA versus 1-MCP (C). Protein spots in red are statistically significant (< 0.01) altered and their identification details can be found in Supplementary Table S1.*

**Supplementary Table S1.** Protein identification of apple skin following label free-gel proteomic analysis.

**Supplementary Table S2.** Sequences of *primers used for RT-PCR.*

**Supplementary Table S3.** Sequences of adapters for the *EcoRI* and *HpaII/MspI* ligation step, and for the pre-selective (*EcoRI*+1, *HpaII/MspI*+1) and selective (*EcoRI*+3, *HpaII/MspI*+3) amplifications.

**Supplementary Table S4.** Apple skin metabolites that affected by DPA and 1-MCP.

**Supplementary Table S5.** Details of identified metabolites and their participation in biological pathways.

**Supplementary Table S6:** Enrichment analysis based on significance according to Fisher exact test (p-value)
